# Supplementary material
Source: HighWire-hosted journal article supplement (https://erj.ersjournals.com/content/55/4/1900725)
Supplement: inline-supplementary-material-1 [file inline-supplementary-material-1.pdf]

# Supplementary Information

## Contents

Supplementary Information .....7

1.0 Delphi Survey results .....7

    1.1 Results from 1st survey .....7

    1.2 Results from 2nd survey .....7

    1.3 Results from final survey .....7

2.0 Summary of consensus validation analysis.....7

    2.1 1st validation summary - grid swap.....7

    2.2 2<sup>nd</sup> validation summary - photograph swap .....7

3.0 Link to example images .....7

4.0 Table of Genotype by TEM phenotype .....7

5.0 Supplementary Figure 1.....7

6.0 Example reports.....7

## 1.0 Delphi Survey results

### 1.1 Results from 1st survey

Question 1: Please select which of the following you consider to be a hallmark PCD defect.

**We unanimously agreed that these three defects are hallmark:**

- **Outer dynein arm absence**
- **Combined outer and inner dynein arm absence**
- **Combined inner dynein arm absence and microtubular disorganisation.**

Question 2: Would you consider any of the following TEM defects to be diagnostic of PCD?

**We agreed (>80%) that the following defects can be considered to be diagnostic of PCD but not always (i.e they are not hallmark)**

- Central complex defect
- Mislocalisation of basal bodies with few or no cilia
- Outer dynein arm absence from 25%-50% cross sections
- Combined inner and outer dynein arm absence from 25-50% cross sections

**We did not reach consensus regarding the following:**

- Inner dynein arm defect (2 did not respond): **No 43% Yes (any category) 57%**
- Isolated microtubular disorganisation (1 did not respond): **No 29% Yes (any category) 71%**
- Outer dynein arm absence <25% cilia (1 did not respond): **No 21% Yes (any category) 79%**
- Combined outer and inner dynein arm absence <25% cilia (1 did not respond): **No 21% Yes (any category) 79%**

Orientation defect: **No** 43% **Yes (any category)** 57%  
Abnormally long cilia: **No** 57% **Yes (any category)** 43%

Question 3: Please describe what you consider to be 'hallmark' for each of the following e.g. 'outer dynein arm absence': absence of the whole outer dynein arm from the majority of cross sections.

We have many descriptions of the hallmark defects. Highlighting nicely why this consensus is necessary. These have been combined together for example for the ODA with the phrase below for voting in the second round.

Absence of the whole or part of the outer dynein arm structure from the majority of (>5) microtubular doublets in the majority (>50%) of cilia cross sections **OR** Presence of the complete outer dynein arm structure on the minority of ( $\leq 4$ ) microtubular doublets in the majority (>50%) of cilia cross sections.

Question 4: Which of the following items is it important to include in a TEM cilia report?

**We met consensus (>80%) that it is important to include in every TEM cilia report**

- Source of the sample (e.g. nasal brushing)
- Adequacy of the sample
- The number of cross sections assessed
- % abnormal cilia
- Presence of the central complex
- The consistency of a defect across several cells
- 1 sentence summary of key findings

**We also met consensus that in (all or some) circumstances the following should be included:**

- Orientation/ alignment of the basal body or central pair of microtubules
- The number of cells assessed
- Blebs/membrane swelling/membrane condition
- Presence of compound cilia (more than one axoneme within a membrane)
- Preservation of the sample
- % cilia with a hallmark defect
- Presence of shortened or truncated ODA projections
- Microtubular organisation
- Evidence of inflammation
- Evidence of bacteria

**We did not meet consensus on**

- Estimated location of defect (distal or proximal)
- location of the basal body
- Presence of nexin links/DRC
- Presence of radial spokes
- Fixation and processing protocol
- Section thickness
- Comments on the semi- thin sections
- Evidence of blood
- % ciliated cells
- Length of cilia

## 1.2 Results from 2nd survey

Question 1: Please state whether you agree or disagree with the definitions in the text above. If you disagree please rephrase the definition in the comments box below

18 respondents:

ODA defect definition 17/18 agreed (94%)

ODA+IDA defect definition 13/18 agreed (72%) DID NOT MEET CONSENSUS

IDA & MTD defect definition 15/18 agreed (83%)

Question 2: Using the definition above what is the minimum number of ciliary axonemes in cross section needed to assess before confirming a hallmark defect

Consensus 80% = 50, median = 50, mode = 50, mean = 58

Question 3: Please list your criteria for inclusion of a ciliary axoneme in cross section in your assessment. Examples may include: an intact membrane, sufficient contrast to see the radial spokes, visualisation of a healthy epithelial cell from which the cross section originates, presence of 9 microtubular doublets and a central pair etc. This question is designed to understand differences in the number of cross sections we assess.

Themes included: Membrane =14, Cell =6, Contrast =5, Visualisation of other structures =10

Question 4: The following defects can be considered to be suggestive of PCD if reproducible on a second sample or culture AND consistent with supporting evidence from other investigations

### **We met consensus on**

Central complex defect (83%)

Outer dynein arm absence from 25-50% cilia (83%)

Combined outer dynein arm and inner dynein arm absence from 25-50% cilia (82%)

### **We did not meet consensus**

Microtubular disorganisation with IDA present (78%)

Mislocalisation of basal bodies with few or no cilia (77%)

Outer dynein arm absence from <25% cilia (50%)

Outer and inner dynein arm absence <25% cilia (50%)

## 1.3 Results from final survey

Q1: Please state whether you agree or disagree with the definitions in the text box above.

Inner and outer dynein arm defect:

Absence of the whole or larger part of the outer dynein arm structure from the majority of (> 5) microtubular doublets in the

majority (>50%) of cilia cross sections coupled with absence of the whole or larger part of the inner dynein arm structure from the majority of (> 7) microtubular doublets in the majority (>50%) of ciliary axonemes visualised in cross section

Agree 82%

Q2: In the first round of the survey we agreed '% defects' should be included in the report. In the second round discussions we realised this is a vague definition. Do you agree or disagree the following should be included in the final TEM report

% Hallmark defects Agree 94%

% Hallmark and class 2 defects Agree 82%

% All defects Agree 65%

## 2.0 Summary of consensus validation analysis

### 2.1 1st validation summary - grid swap

| Diagnosis                       | Expected guideline result                  | Returned results            |                             |                                            |                             |        |                       |
|---------------------------------|--------------------------------------------|-----------------------------|-----------------------------|--------------------------------------------|-----------------------------|--------|-----------------------|
|                                 |                                            | 1                           | 2                           | 3                                          | 4                           | 5      | 6                     |
| DNAI2                           | Class 1: ODA                               | ODA+IDA                     | ODA                         | Insuff                                     | ODA                         |        |                       |
| DNAAF1                          | Class 1: ODA+IDA                           | ODA+IDA                     | ODA+IDA                     | ODA+IDA                                    | ODA+IDA                     |        |                       |
| Cystic fibrosis                 | Normal Ultrastructure                      | Normal Ultrastructure       | Normal Ultrastructure       | Normal Ultrastructure (chronic bronchitis) | Normal Ultrastructure       | Insuff | Normal Ultrastructure |
| DRC1                            | Normal Ultrastructure (MTD)                | Normal Ultrastructure (MTD) | Normal Ultrastructure (MTD) | Normal Ultrastructure                      | Normal Ultrastructure (MTD) | Insuff | Normal Ultrastructure |
| CCNO                            | Class 2: mislocalised BB + few or no cilia | Insuff                      | Insuff                      | Insuff                                     | Insuff                      |        |                       |
| CCDC40                          | Class 1: IDA + MTD                         | IDA + MTD                   | Insuff                      | IDA + MTD                                  | IDA + MTD                   |        |                       |
| CCDC114                         | Class 1: ODA                               | ODA+IDA                     | ODA+IDA                     | ODA                                        | Mixed (predominant ODA)     |        |                       |
| Inadequate - non pcd            | Inadequate                                 | Insuff                      | Insuff                      | Class 2: mislocalised BB + few or no cilia | Insuff                      |        |                       |
| RSPH4A                          | Class2: CC                                 | IDA + MTD                   | CC                          | CC                                         | CC                          | CC     | CC                    |
| DNAAF3                          | Class 1: ODA+IDA                           | ODA+IDA                     | ODA+IDA                     | ODA                                        | ODA+IDA                     |        |                       |
| CCDC39                          | Class 1: IDA + MTD                         | Insuff (IDA+MTD)            | ODA                         | Insuff                                     | Insuff                      |        |                       |
| Healthy Volunteer               | Normal Ultrastructure                      | Insuff                      | class 2                     | Normal Ultrastructure                      | Normal Ultrastructure       |        |                       |
| DNAH11                          | Normal Ultrastructure                      | ODA                         | Insuff                      | Normal Ultrastructure                      | Normal Ultrastructure       |        |                       |
| DNAH5                           | Class 1: ODA                               | ODA                         | ODA+IDA                     | ODA+IDA                                    | ODA+IDA                     | ODA    | ODA                   |
| Inadequate - Unaffected sibling | Inadequate                                 | class 2 lack cilia          | Insuff                      | Insuff                                     | CC                          |        |                       |

### Main results summarised

- 100% participation
- There were no false positive diagnoses (i.e No non-PCD sample was classed as having a Class1 Hallmark PCD defect)
- 17/68 (25%) sections were described as insufficient or inadequate for assessment
  - These included 100% returns on a CCNO case and 75% returns for a sample included as an inadequate sample. The 4<sup>th</sup> operator defined this inadequate sample as class 2: basal body mislocalisation with few or no cilia.
  - In 2 further samples in which 75% returns recorded mostly as inadequate the 4<sup>th</sup> operator recorded the incorrect defect.
- 25/25 (100%) correct identification as a class 1 hallmark defect
  - However 8/25 (32%) returns recorded an incorrect name of the class 1 defect
    - ODA defect: recorded as ODA+IDA defect (n=6)
    - ODA and IDA defect: recorded as ODA defect (n=1)
    - MTD and IDA defect: recorded as ODA defect (n=1)
  - 2 cases were described as having a class1 defect when they had a class 2 defect or normal ultrastructure
    - 1 DNAH11 case described as ODA defect
    - 1 RSPH4a case described as IDA + MTD
- 5/6 correct identification of class 2 defects
- 4 normal ultrastructure cases identified as a class 2 defect
  - 2 central complex

- b. 1 mislocalisation of basal bodies

### Comments, feedback and suggested actions for discussion

All centres have received feedback on individual results and asked for feedback on the process and guideline. If you have not please let me know

### Inadequate or insufficient samples

- There were some patterns as to which were deemed inadequate but not all can be explained by poor quality grids. Reasons listed in feedback included: Poor contrast, poor orientation, insufficient cilia, different grid types, different types of sample e.g. culture vs biopsy vs brushing. Operators may find it more difficult to assess grids which were not prepared at their own centre.

\*Action: Following update of the guideline re-assess using TEM photographs of cross sections

- Some reports described samples with microtubular defects as inadequate because microtubules could not clearly be seen.

\*Action: Update guideline to stress the importance of assessment of arms in perfect cross sections but microtubular organisation in all cross sections.

### Miscoding of ODA vs ODA and IDA defects

Missing IDAs in ODA defects

\*Action. Reduce the number of arms required to say IDA is present and discuss in the text OR as previous proposed by HO, that the term: class 1 hallmark defect of the ODA +/- IDA should be used if at all unsure (e.g. a poor sample or unfamiliar sample preparation)

### Class 2 defects

- 3 centres were able to identify the DRC defect

\*Action: include MTD in the class 2 defect list

Use of class 2: basal body mislocalisation with few or no cilia –used to describe inadequate samples

\*Action: Extend the text around this defect

## 2.2 2<sup>nd</sup> validation summary - photograph swap

- **100% participation**
- **There were no false positive diagnoses** (i.e No non-PCD sample was classed as having a Class1 Hallmark PCD defect)
  - Normal ultrastructure identified by 18/18 centres
- **100% correct identification as a class 1 hallmark defect**
  - 18/18 correctly identified MTD + IDA
  - 17/18 ODA (1 judged as ODA+IDA)
  - 17/18 ODA+IDA (1 judged ODA- same centre as above (respiratory clinician participant not microscopist or pathologist)
- **100% correct identification as a class 2 defect**
  - 15/18 central complex defect (3 judged as MTD)

## 3.0 Link to example images and reports

<https://uod.box.com/s/3isd4vk26qj2ac738krm2qlnj2gqf6wa>

## 4.0 Table of Genotype by TEM phenotype

| Class 1 defects                                   | Gene            | Comments                                                                                     |
|---------------------------------------------------|-----------------|----------------------------------------------------------------------------------------------|
| Outer dynein arm defect                           | <i>DNAH5</i>    | Can be subtle with some missense mutations<br><br><br><br><br><br>Distal cross sections only |
|                                                   | <i>DNAI1</i>    |                                                                                              |
|                                                   | <i>DNAI2</i>    |                                                                                              |
|                                                   | <i>DNAL1</i>    |                                                                                              |
|                                                   | <i>NME8</i>     |                                                                                              |
|                                                   | <i>DNAH9</i>    |                                                                                              |
|                                                   | <i>CCDC114</i>  |                                                                                              |
|                                                   | <i>ARMC4</i>    |                                                                                              |
|                                                   | <i>CCDC151</i>  |                                                                                              |
|                                                   | <i>TTC25</i>    |                                                                                              |
|                                                   | <i>MNS1</i>     |                                                                                              |
| Outer and inner dynein arm                        | <i>DNAAF1</i>   |                                                                                              |
|                                                   | <i>DNAAF2</i>   |                                                                                              |
|                                                   | <i>DNAAF3</i>   |                                                                                              |
|                                                   | <i>DNAAF4</i>   |                                                                                              |
|                                                   | <i>DNAAF5</i>   |                                                                                              |
|                                                   | <i>LRRC6</i>    |                                                                                              |
|                                                   | <i>ZMYND10</i>  |                                                                                              |
|                                                   | <i>SPAG1</i>    |                                                                                              |
|                                                   | <i>C21ORF59</i> |                                                                                              |
|                                                   | <i>PIH1D3</i>   |                                                                                              |
|                                                   | <i>CCDC103</i>  |                                                                                              |
| Inner dynein arm and microtubular disorganisation | <i>CCDC39</i>   |                                                                                              |
|                                                   | <i>CCDC40</i>   |                                                                                              |
| Class 2 defects                                   |                 |                                                                                              |
| Microtubular disorganisation                      | <i>CCDC164</i>  |                                                                                              |
|                                                   | <i>CCDC65</i>   |                                                                                              |
|                                                   | <i>GAS8</i>     |                                                                                              |
| Central complex defect                            | <i>RSPH1</i>    |                                                                                              |
|                                                   | <i>RSPH4A</i>   |                                                                                              |
|                                                   | <i>RSPH9</i>    |                                                                                              |
|                                                   | <i>RSPH3</i>    |                                                                                              |
|                                                   | <i>DNAJB13</i>  |                                                                                              |
| Not diagnostic                                    | <i>HYDIN</i>    | Some central pair abnormalities and absence of c2t<br>absence                                |
|                                                   | <i>STK36</i>    |                                                                                              |
| Mislocalisation of basal bodies                   | <i>CCNO</i>     |                                                                                              |
|                                                   | <i>MCIDAS</i>   |                                                                                              |
| Not-diagnostic                                    | <i>CCDC11</i>   | Can be identified with electron tomography                                                   |
|                                                   | <i>ENKUR</i>    |                                                                                              |
|                                                   | <i>GAS2L2</i>   |                                                                                              |
|                                                   | <i>LRRC56</i>   |                                                                                              |
|                                                   | <i>DNAH11</i>   |                                                                                              |

# 5.0 Supplementary Figure 1: Normal ultrastructure in longitudinal section

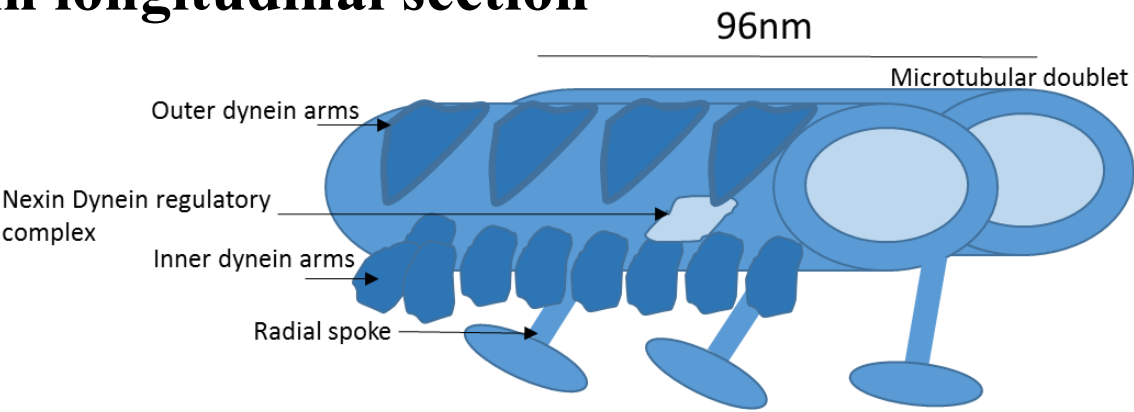

## 5.0 Example reports

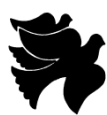

### THE CYPRUS INSTITUTE OF NEUROLOGY AND GENETICS

Department of Electron Microscopy

P.O.Box 23462  
1683 Nicosia, CYPRUS  
Tel.: 22392631 (Office)  
22392792 (Lab)  
Fax.: 22358237

EM No.: R-72 (C1)  
Specimen Request Form

|                                                                                                                                                                                                                                                                                                                                                                                                                                                                                                                                                                                                                                                                                                                                                                                                                                                                                 |                |                    |  |
|---------------------------------------------------------------------------------------------------------------------------------------------------------------------------------------------------------------------------------------------------------------------------------------------------------------------------------------------------------------------------------------------------------------------------------------------------------------------------------------------------------------------------------------------------------------------------------------------------------------------------------------------------------------------------------------------------------------------------------------------------------------------------------------------------------------------------------------------------------------------------------|----------------|--------------------|--|
| Patient Surname:                                                                                                                                                                                                                                                                                                                                                                                                                                                                                                                                                                                                                                                                                                                                                                                                                                                                |                | Name:              |  |
| ID Number:                                                                                                                                                                                                                                                                                                                                                                                                                                                                                                                                                                                                                                                                                                                                                                                                                                                                      | Date of Birth: | Sex:               |  |
| Patient Address:                                                                                                                                                                                                                                                                                                                                                                                                                                                                                                                                                                                                                                                                                                                                                                                                                                                                |                |                    |  |
| Referring Doctor:                                                                                                                                                                                                                                                                                                                                                                                                                                                                                                                                                                                                                                                                                                                                                                                                                                                               |                | Hospital File No.: |  |
| Site of Biopsy: Nasal Brushing                                                                                                                                                                                                                                                                                                                                                                                                                                                                                                                                                                                                                                                                                                                                                                                                                                                  |                | Histology No.:     |  |
| <div><div>ELECTRON MICROSCOPY REPORT</div><div>The specimen obtained was of very good quality and appeared well preserved. Electron microscopy was performed on 68 ciliary cross-sections. Ultrastructural analysis revealed abnormal ultrastructure across the sample (100%) with low numbers of outer and inner dynein arms in all ciliary cross-sections. Among the cross-sections examined there was limited evidence of tubular disorganization (7%) and central pair disorientation (9%). Few cross-sections presented with some membrane swelling (6%). Moderate evidence of inflammation and no evidence of bacteria was observed. 3% compound cilia were detected.<br/><b>Summary of key findings:</b> These results are consistent with the diagnosis of Primary Ciliary Dyskinesia, with a class 1 defect. A combined outer and inner dynein arm defect.</div></div> |                |                    |  |

Date reported: 31/07/2018

|                                      |                             |             |
|--------------------------------------|-----------------------------|-------------|
| <b>Name:</b> <b>Example</b>          | <b>EM No.</b> <b>18/269</b> | <b>CRN:</b> |
| <b>Date of Birth:</b>                | <b>Reason for referral</b>  |             |
| <b>Sample:</b> <b>Nasal brushing</b> |                             |             |

Ciliary profile counts:

Microtubular arrangement

Dynein arms

| Normal microtubular arrangement | Dis-arranged | Extra Tubule | Single Tubule | Other Defect | One of Pair Missing | Both of Pair Missing | Com-pound | Total Cilia |  | Both Arms present | Outer Arms absent | Inner Arms absent | No arms | Total Cilia |
|---------------------------------|--------------|--------------|---------------|--------------|---------------------|----------------------|-----------|-------------|--|-------------------|-------------------|-------------------|---------|-------------|
| 83                              | 5            | 7            | 5             | 0            | 0                   | 0                    | 0         | 100         |  | 29                | 0                 | 0                 | 0       | 29          |
| 89                              | 3            | 3            | 4             | 0            | 1                   | 0                    | 0         | 100         |  | 44                | 0                 | 0                 | 0       | 44          |
| 86%                             | 4%           | 5%           | 4.5%          | -            | <1%                 | -                    | -         |             |  | 100%              | -                 | -                 | -       |             |

Comments: Unhealthy but adequate sample. Some distorted ciliary membranes. Some ciliary disorientation seen. Normal longitudinal profile.

**Summary: Predominantly normal ciliary ultrastructure with both dynein arms present. Normal ultrastructure does not exclude a diagnosis of PCD**



**International consensus guideline for reporting transmission electron microscopy results in the diagnosis of  
Primary Ciliary Dyskinesia**

**Shoemark et al.**
