# Supplementary material
Source: HighWire-hosted journal article supplement (https://erj.ersjournals.com/content/55/4/1900725)
Supplement: inline-supplementary-material-2 [file inline-supplementary-material-2.pdf]

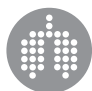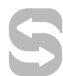

SHAREABLE PDF

# International consensus guideline for reporting transmission electron microscopy results in the diagnosis of primary ciliary dyskinesia (BEAT PCD TEM Criteria)

Amelia Shoemark <sup>1,2</sup>, Mieke Boon<sup>3</sup>, Christoph Brochhausen<sup>4</sup>, Zuzanna Bukowy-Bieryllo <sup>5</sup>, Maria M. De Santi<sup>6</sup>, Patricia Goggin<sup>7</sup>, Paul Griffin<sup>1,8</sup>, Richard G. Hegele<sup>9</sup>, Robert A. Hirst<sup>10</sup>, Margaret W. Leigh<sup>11</sup>, Alison Lupton<sup>12</sup>, Karen MacKenney<sup>13</sup>, Heymut Omran<sup>14</sup>, Jean-Claude Pache<sup>15</sup>, Andreia Pinto <sup>16</sup>, Finn P. Reinholt<sup>17</sup>, Josep Schroeder<sup>4</sup>, Panayotis Yiallourous<sup>18</sup> and Estelle Escudier<sup>19</sup>, representing the BEAT-PCD Network Guideline Development Group<sup>1</sup>

**Affiliations:** <sup>1</sup>Royal Brompton Hospital, London, UK. <sup>2</sup>School of Medicine, University of Dundee, Dundee, UK. <sup>3</sup>Dept of Pediatrics, University Hospital Leuven, Leuven, Belgium. <sup>4</sup>Institute of Pathology, University Regensburg, Regensburg, Germany. <sup>5</sup>Institute of Human Genetics, Polish Academy of Sciences, Poznan, Poland. <sup>6</sup>Dept of Pathology, University Hospital of Siena, Siena, Italy. <sup>7</sup>University Hospital Southampton NHS Foundation Trust, Southampton, UK. <sup>8</sup>Royal Childrens Hospital, Melbourne, Australia. <sup>9</sup>Hospital for Sick Children-University of Toronto, Toronto, ON, Canada. <sup>10</sup>Dept of Respiratory Sciences, University of Leicester, Leicester, UK. <sup>11</sup>Dept of Pediatrics and Marsico Lung Institute, University of North Carolina, Chapel Hill, NC, USA. <sup>12</sup>Pathology Dept, Greater Glasgow and Clyde, Queen Elizabeth University Hospital, Glasgow, UK. <sup>13</sup>NSW Health Pathology, Concord Repatriation General Hospital, Sydney, Australia. <sup>14</sup>Dept of Pediatrics, University Hospital Muenster, Muenster, Germany. <sup>15</sup>University Hospital of Geneva, Geneva, Switzerland. <sup>16</sup>Instituto de Medicina Molecular, Lisbon, Portugal. <sup>17</sup>Oslo University Hospital, Oslo, Norway. <sup>18</sup>Medical School, University of Cyprus, Nicosia, Cyprus. <sup>19</sup>Sorbonne Université, Faculté de Médecine, INSERM UMR\_S933, (APHP) Assistance Publique Hôpitaux de Paris and CHIC (Centre Hospitalier Intercommunal de Créteil), Paris, France.

**Correspondence:** Amelia Shoemark, Primary Ciliary Dyskinesia Centre, Paediatric Respiratory Medicine, Royal Brompton Hospital, Sydney Street, London, SW3 6NP, UK. E-mail: a.shoemark@dundee.ac.uk

@ERSpublications

**This tested and validated consensus statement provides clear terminology and defect definitions for the ultrastructural diagnosis of primary ciliary dyskinesia (PCD). The guideline will facilitate standardisation of PCD research and diagnosis.** <http://bit.ly/2RDkz7k>

**Cite this article as:** Shoemark A, Boon M, Brochhausen C, *et al.* International consensus guideline for reporting transmission electron microscopy results in the diagnosis of primary ciliary dyskinesia (BEAT PCD TEM Criteria). *Eur Respir J* 2020; 55: 1900725 [https://doi.org/10.1183/13993003.00725-2019].

This single-page version can be shared freely online.

**ABSTRACT** Primary ciliary dyskinesia (PCD) is a heterogeneous genetic condition. European and North American diagnostic guidelines recommend transmission electron microscopy (TEM) as one of a combination of tests to confirm a diagnosis. However, there is no definition of what constitutes a defect or consensus on reporting terminology. The aim of this project was to provide an internationally agreed ultrastructural classification for PCD diagnosis by TEM.

A consensus guideline was developed by PCD electron microscopy experts representing 18 centres in 14 countries. An initial meeting and discussion were followed by a Delphi consensus process. The agreed

guideline was then tested, modified and retested through exchange of samples and electron micrographs between the 18 diagnostic centres.

The final guideline a) provides agreed terminology and a definition of Class 1 defects which are diagnostic for PCD; b) identifies Class 2 defects which can indicate a diagnosis of PCD in combination with other supporting evidence; c) describes features which should be included in a ciliary ultrastructure report to assist multidisciplinary diagnosis of PCD; and d) defines adequacy of a diagnostic sample.

This tested and externally validated statement provides a clear guideline for the diagnosis of PCD by TEM which can be used to standardise diagnosis internationally.
